# 1 **Fecal transplant allows transmission of the gut microbiota in honey bees.**

2

3 Amélie Cabirol<sup>1,\*,#</sup>, Audam Chhun<sup>1,\*,#</sup>, Joanito Liberti<sup>1,2</sup>, Lucie Kesner<sup>1</sup>, Nicolas

4 Neuschwander<sup>1</sup>, Yolanda Schaerli<sup>1</sup>, Philipp Engel<sup>1</sup>

5

6 <sup>1</sup> Department of Fundamental Microbiology, University of Lausanne, Switzerland

7 <sup>2</sup> Department of Ecology and Evolution, University of Lausanne, Switzerland

8 \* Corresponding authors: [amelie.cabirol@unil.ch](mailto:amelie.cabirol@unil.ch), [audam.chhun@unil.ch](mailto:audam.chhun@unil.ch)

9 # Authors contributed equally to this work

10

11 **Keywords:** host-microbe interactions, microbiome, 16S rRNA gene, social insects, *Apis*

12 *mellifera*

13

## 14 **Abstract**

15 The gut of honey bees is colonized by symbiotic bacteria during the first days of adult life,  
16 once bees have emerged from their wax cells. Within five days, the gut microbiota becomes  
17 remarkably stable and consistent across individual bees. Yet, the modes of acquisition and  
18 transmission of the gut microbiota are to be confirmed. Few studies suggested bees could  
19 be colonized via contact with fecal matter in the hive and via social interactions. However,  
20 the composition of the fecal microbiota is still unknown. It is particularly unclear whether all  
21 bacterial species can be found viable in the feces and can therefore be transmitted to  
22 newborn nestmates. Using 16s rRNA gene amplicon sequencing we revealed that the  
23 composition of the honey bee fecal microbiota is strikingly similar to the microbiota of entire  
24 guts. We found that fecal transplantation resulted in gut microbial communities largely similar  
25 to those obtained from feeding gut homogenates. Our study shows that fecal sampling and  
26 transplantation are viable tools for the longitudinal analysis of bacterial community

27 composition and host-microbe interactions. Our results also imply that contact of young bees  
28 with fecal matter in the hive is a plausible route for the acquisition of the core gut microbiota.

29

30

## 31 Introduction

32 Over the past decade, honey bees (*Apis mellifera*) have become pivotal insect models for  
33 the study of gut microbiota evolution and function<sup>1-3</sup>. This is due to the relatively simple  
34 composition and consistency of their gut microbiota, the possibility to study *in-vitro* and *in-*  
35 *vivo* defined communities of gut bacteria, as well as the recent opportunity to genetically  
36 engineer some of the gut symbionts<sup>4-6</sup>. The honey bee gut microbiota has also attracted a lot  
37 of attention due to its important role in shaping the health and behavior of these essential  
38 pollinators<sup>7-10</sup>.

39 The honey bee gut is subdivided into four distinct sections: the crop and midgut contain  
40 few bacteria, while the ileum and rectum, together forming the hindgut, contain most core  
41 members of the honey bee gut microbiota in different proportions<sup>4,11</sup>. The core bacteria  
42 *Gilliamella* and *Snodgrassella* are predominant in the ileum, where they form a biofilm, while  
43 *Bombilactobacillus* Firm-4, *Lactobacillus* Firm-5, and *Bifidobacterium* dominate the rectum  
44 community<sup>11-13</sup>. How such stable gut bacterial communities are transmitted between  
45 individuals remains unclear in this social insect.

46 Honey bee workers are known to progressively acquire their gut microbiota during the  
47 first week of adult life in the hive, after emerging from their wax cells<sup>11,12</sup>. The presence of  
48 adult nurse bees<sup>11</sup> or fresh pollen from the hive<sup>14</sup> in the environment of newly emerged bees  
49 was shown to promote the acquisition of the core microbiota. Suggested mechanisms in  
50 these studies are: (i) direct transmission *via* trophallaxis behavior, where bees actively  
51 exchange the food content of their crop in a mouth-to-mouth interaction, and (ii) indirect  
52 transmission *via* contact with the fecal matter of nurse bees deposited in the hive  
53 environment. Recent studies found that trophallaxis with nurse bees alone was not sufficient<sup>12</sup>  
54 and even unnecessary<sup>14</sup> for newly emerged bees to acquire the core gut microbiota. Instead,  
55 exposure to hindgut homogenate successfully led to a gut microbiota community similar to  
56 the one of hive bees. Gut homogenates, however, not only contain fecal matter, but also the

57 communities of bacteria attached to the gut epithelium. The source of gut microbiota  
58 transmission thus remains ambiguous. Since honey bees do not systematically defecate in  
59 laboratory conditions while kept in cages, the use of hindgut homogenates over isolated fecal  
60 matter has so far been predominant in the field; whether it is to investigate the mechanisms  
61 underlying microbiota transmission or to inoculate microbiota-free (MF) individuals in the  
62 context of *in vivo* experiments. Nonetheless, work carried out by our group and others  
63 established protocols for routine feces sampling of honey and bumble bees,  
64 respectively<sup>5,15,16</sup>. It remains uncertain whether all gut microbiota phylotypes, especially those  
65 preferentially colonizing the ileum and forming biofilms, are viable and present in sufficient  
66 quantities in fecal matter to allow microbiota transmission across individuals.

67 Thus, our investigation set out to validate the hypothesis that the honey bee gut  
68 microbiota can be naturally transmitted through contact with fecal matter by quantifying the  
69 relative transmission of the different bacteria present in feces. Using qPCR quantification and  
70 amplicon sequencing targeting the 16S rRNA gene, we compared the bacterial taxonomic  
71 composition in the feces and guts collected from the same nurse bees (generation no. 1) to  
72 understand whether the feces of honey bees provide a robust proxy for their gut microbiota  
73 (**Fig. 1**). We then analyzed the bacterial taxonomic composition in the gut of bees fed with  
74 feces or gut homogenate a week post-inoculation to determine whether ingestion of feces  
75 allows transmission of the microbiota from adults to newly emerged microbiota-free bees  
76 (generation no. 2). Our results demonstrate that the gut microbiota composition can be non-  
77 invasively monitored using fecal sampling, and that transplantation of fecal matter into  
78 microbiota-free bees is a reliable and ecologically relevant method to study microbiota  
79 transmission and host-microbe interaction.

80

81 .

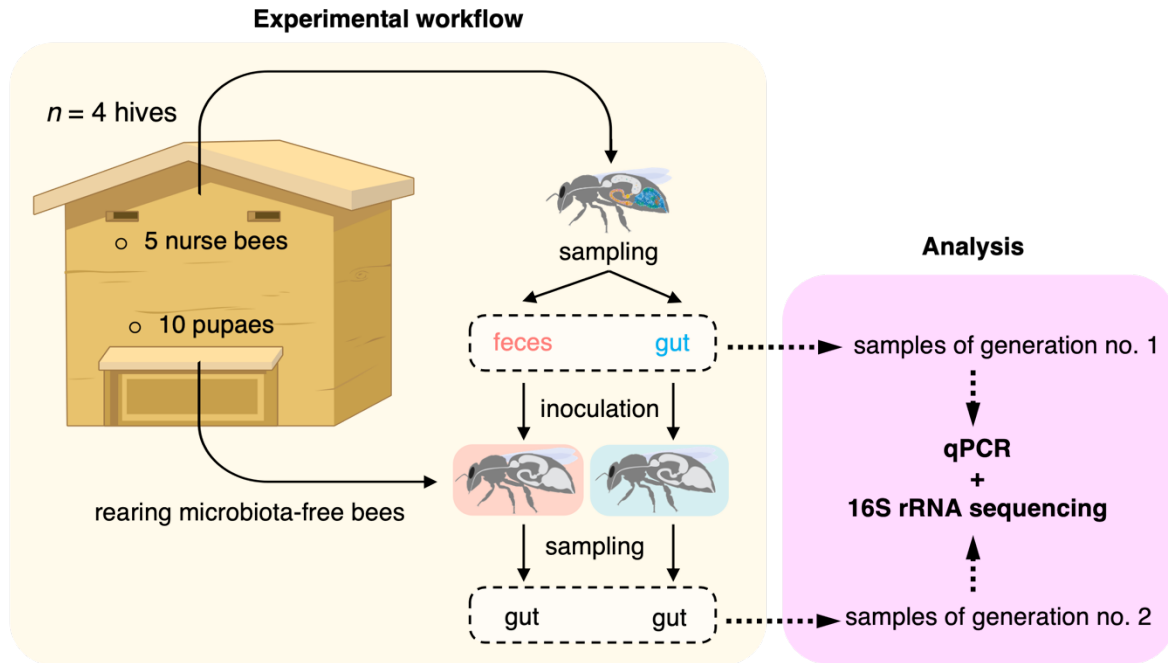

**Figure 1. Schematic outline of the experimental workflow.** The feces and gut from five nurse bees were collected to compare their bacterial composition (generation no. 1) and to inoculate five microbiota-free newly emerged bees (generation no. 2). A week post-inoculation, the guts of inoculated bees were collected, and their bacterial composition assessed. Bacterial total and relative abundances in the feces and gut samples were measured by quantitative PCR and 16s rRNA gene amplicon sequencing, respectively. The experiment was replicated four times using distinct hives.

82

## 83 **Results**

### 84 **Characterization of the honey bee fecal microbiota.**

85 To establish whether feces of honey bees are a robust proxy for their gut microbiota,  
86 we compared the microbial communities present in feces *versus* gut samples of nurse honey  
87 bees from four distinct hives (**Fig. 2**).

88 Honey bee feces were rich in bacteria, with a median bacterial load of  $1.58 \cdot 10^6$  cells  
89  $\mu\text{l}^{-1}$  of feces (95% CI [ $9.20 \cdot 10^5$ ,  $2.59 \cdot 10^6$ ]) (**Supplementary Fig. 1**). More importantly, the  
90 bacterial communities present in feces were remarkably similar to the ones found in the guts  
91 of naturally colonized honey bees (**Fig. 2**). The predominant genera of the gut microbiota of

92 honey bees were detected in both gut and fecal samples, namely *Bombilactobacillus* Firm-4,  
93 *Lactobacillus* Firm-5, *Gilliamella*, *Snodgrassella*, *Bifidobacterium*, *Frischella*, *Bartonella*,  
94 *Commensalibacter* and *Apilactobacillus* (formerly *Lactobacillus kunkeei*) (**Fig. 2a**)<sup>1,17,18</sup>. This  
95 was the case for all samples across the different hives tested, with the exception however of  
96 two bees from hive 15, which appeared to have very low bacterial complexity. We considered  
97 these samples as outliers that may have arisen from technical errors considering further  
98 analysis discussed below.

99 Diversity of the gut and fecal bacterial communities appeared overall comparable, as  
100 measured by alpha- and beta-diversity metrics. Alpha-diversity, which considers species  
101 richness and evenness within samples, was significantly higher in the gut samples compared  
102 to the fecal samples as measured using the Shannon index (Wilcoxon matched-pairs test,  $Z$   
103 = 179,  $p$ -value = 0.0042) and Simpson metric (paired  $t$ -test,  $t_{(19)} = 3.39$ ,  $p$ -value = 0.0031;**Fig.**  
104 **2b**). A differential analysis revealed that only chloroplasts differed significantly in relative  
105 abundance between the fecal and gut samples likely because gut samples contained more  
106 pollen material (**Supplementary Fig. 2**; 13,711,506-fold change, adjusted  $p$ -value < 0.0001).  
107 Yet, the significant difference in alpha-diversity metrics remained after removing chloroplast  
108 DNA from the analysis (Shannon index: Wilcoxon matched-pairs test,  $Z = 177$ ,  $p$ -value =  
109 0.0056; Simpson metric: paired  $t$ -test,  $t_{(19)} = 2.7551$ ,  $p$ -value = 0.0126). This difference was  
110 expected as feces constitute a subset of the gut samples. However, there was no significant  
111 difference between the microbiota structure of gut and fecal samples (PERMANOVA test  
112 based on Bray-Curtis dissimilarities,  $p$ -value = 0.1; **Fig. 2c**). Interestingly, Bray-Curtis  
113 dissimilarity matrices of the fecal and gut samples were positively correlated (Mantel test,  $r =$   
114 0.5,  $p$ -value = 0.0041). Consistently, a Procrustes analysis revealed a significant concordance  
115 between the feces and gut datasets (**Fig. 2d**; Procrustes randomization test,  $m^2 = 0.45$ ,  $p$ -  
116 value = 0.0060) indicating that fecal samples were on average more similar to the gut samples  
117 collected from the same individuals than to gut samples belonging to different individuals.

118 Finally, we observed a strong positive correlation in the absolute abundance of the  
 119 most prevalent taxonomic groups between the gut and fecal samples, confirming that the gut  
 120 colonization level of a given amplicon-sequence variant (ASV) was reflected by its  
 121 concentration in the feces (Pearson correlation coefficient  $R = 0.82$ ,  $p$ -value  $< 0.0001$ ; **Fig.**  
 122 **2e**). Taken together, our results demonstrate that feces provide a robust proxy for the honey  
 123 bee gut microbiota composition. Fecal samples allow to infer both the community  
 124 membership (*i.e.* presence/absence of a bacteria) as well as to estimate the absolute bacterial  
 125 abundances (*i.e.* levels of gut colonization) in the gut of individual bees.  
 126

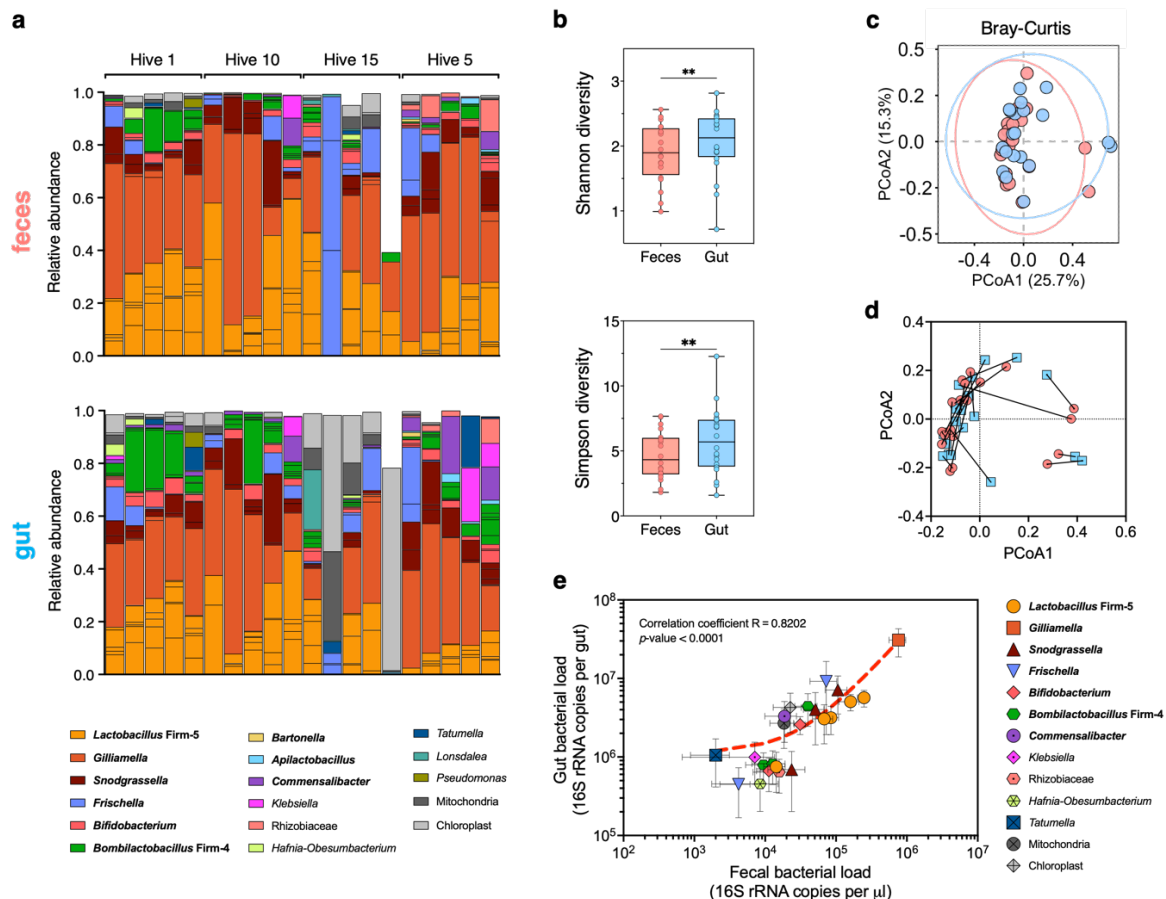

**Figure 2. The fecal microbiota of honey bees is a robust proxy for their gut bacterial communities.** **a** Stacked bar plots showing the relative abundance of identified amplicon-sequence variants (ASVs) grouped at the genus level in the feces (top panel) and gut tissues (bottom panel) of hive bees (generation no. 1). Vertically aligned bars represent samples sourced from the same individual. Their hive numbers are indicated. Only ASVs with relative

abundance above 1% in at least 2 samples are displayed. Prevalent members of the honey bee gut microbiota are in bold. **b** Bacterial  $\alpha$ -diversity was significantly higher in the gut than in the feces of hive bees according to both the Shannon (Wilcoxon matched-pairs test (two-tailed)) and Simpson indexes (paired t-test). \*\*  $P < 0.005$ . **c** Principal-coordinate analysis (PCoA) based on the Bray-Curtis dissimilarity index showed no significant difference in  $\beta$ -diversity between the feces (red) and gut (blue) samples (PERMANOVA test, not significant). **d** Procrustes analysis of relative ASV abundances in the feces (red) against gut (blue) samples of hive bees revealed a significant agreement of comparison. Longer lines on Procrustes plots indicate more dissimilarity between samples sourced from the same individual. **e** Scatter plot showing a significant correlation between the absolute abundances of bacteria genera in the gut and the feces samples (Pearson's correlation coefficient and  $p$ -value are displayed). Only ASVs with absolute abundance above 1% in at least 5 samples are displayed for clarity. The red dotted line represents the linear regression curve (appearing non-linear due to log axes).

127

128 **Transmission of the gut microbiota to microbiota-free honey bees via fecal**  
129 **transplantation.**

130 We next tested if ingestion of feces would be sufficient and equivalent to gut homogenates  
131 for microbiota transmission to newly emerged bees (**Fig. 3**). Five  $\mu\text{l}$  of fecal inoculum ( $7.89 \cdot 10^5$   
132 cells in the inoculum; 95% CI [ $4.60 \cdot 10^5$ ,  $1.29 \cdot 10^6$ ]) was sufficient to successfully seed the gut  
133 of MF honey bees, resulting in colonization levels similar to the ones obtained when feeding  
134 5  $\mu\text{l}$  of gut homogenate ( $3.50 \cdot 10^4$  cells in the inoculum; 95% CI [ $1.61 \cdot 10^4$ ,  $4.25 \cdot 10^4$ ]; Wilcoxon  
135 matched-pairs test,  $Z = 26.00$ ,  $p$ -value = 0.6226; **Fig. 3a**). The microbial communities in  
136 feces- and gut-inoculated bees reached a median of  $1.54 \cdot 10^8$  (95% CI [ $8.57 \cdot 10^7$ ,  $1.63 \cdot 10^8$ ])  
137 and  $1.81 \cdot 10^8$  (95% CI [ $1.03 \cdot 10^8$ ,  $2.22 \cdot 10^8$ ]) cells per gut at day 7 post colonization,  
138 respectively. Additionally, the relative abundances of bacterial genera in those communities  
139 were again remarkably similar, with all prevalent genera of the bee microbiota found in the  
140 gastrointestinal tracts of individuals fed with gut or fecal inoculums (**Fig. 3b**). Even the bees  
141 that received fecal and gut inoculums sourced from the individuals of generation no. 1 from  
142 hive 15 that appeared to have a remarkably low-diversity microbiota (**Fig. 2a**), harbored a



143 normal gut bacterial community here (**Fig. 3a**). This suggests that some technical issues may  
144 have distorted the gut community profiles of those individuals of generation no. 1 in our  
145 previous analysis. Alpha-diversity in the gut, measured with the Shannon and Simpson  
146 indexes, did not differ significantly between inoculum types (**Fig. 3c**; paired *t*-test, Shannon:  
147  $t_{(18)} = -1.93$ ,  $p$ -value = 0.07; Simpson:  $t_{(18)} = -1.45$ ,  $p$ -value = 0.16), although there was a trend  
148 towards higher diversity in feces-inoculated bees. There was also no difference in community  
149 structure between bees fed the two different inoculum types (PERMANOVA using Bray-Curtis  
150 dissimilarities calculated from a matrix of absolute ASV abundance,  $p$ -value = 0.057; **Fig. 3d**).  
151 Honey bees inoculated with fecal material had on average slightly increased relative  
152 abundances of Bifidobacteria and Lactobacilli, which are rectum associated bacteria, than  
153 bees inoculated with gut homogenates (**Supplementary Fig. 3**). Yet, we found a robust  
154 positive correlation in the absolute abundance of the most prevalent genera composing the  
155 gut microbiota between honey bees fed with either gut or fecal inoculums (Pearson  
156 correlation coefficient  $R = 0.89$ ,  $p$ -value < 0.0001; **Fig. 3e**). This confirms that feces are a  
157 good inoculum source, leading to a gut microbiota composition highly comparable to the one  
158 of bees inoculated with a gut homogenate.

159 Finally, we performed two additional comparisons to assess the level of similarity in  
160 the microbiota that established in the gut bees of generation no. 2 and their respective donors  
161 in generation no. 1. First, we tested whether pairs of bees of generation no. 2 inoculated with  
162 feces and guts collected from the same donor were more similar between them than to other  
163 pairs of generation no. 2. Second, we tested whether the composition of the microbiota  
164 established in bees of generation no. 2 was more similar to that of the matched donor bees  
165 than to that of other bees of generation no. 1, for both feces and gut-inoculated bees  
166 independently. Pairs of bees of generation no. 2 inoculated with feces or gut homogenates  
167 originating from the same donor bees, were not more similar in gut microbiota composition  
168 than other generation no. 2 pairs (**Fig. 3f**; Procrustes randomization test,  $m^2 = 0.66$ ,  $p$ -value

169 = 0.49; Mantel test,  $r = 0.0032$ ,  $p$ -value = 0.47). The lack of similarity between matched pairs  
170 was further confirmed when comparing samples across generations (**Supplementary Fig. 4**).  
171 There was no significant concordance in the microbiota of donor and receiver bees across  
172 the two generations for both the feces (Procrustes randomization test,  $m^2 = 0.62$ ,  $p$ -value =  
173 0.15; Mantel test,  $r = -0.17$ ,  $p$ -value = 0.91) and the gut homogenate-inoculated bees  
174 (Procrustes randomization test,  $m^2 = 0.65$ ,  $p$ -value = 0.43; Mantel test,  $r = 0.06$ ,  $p$ -value =  
175 0.33). The absence of concordance between the community structures observed across  
176 generations for matched pairs suggests that community assembly is influenced by other  
177 factors distinct from the inoculum source.  
178

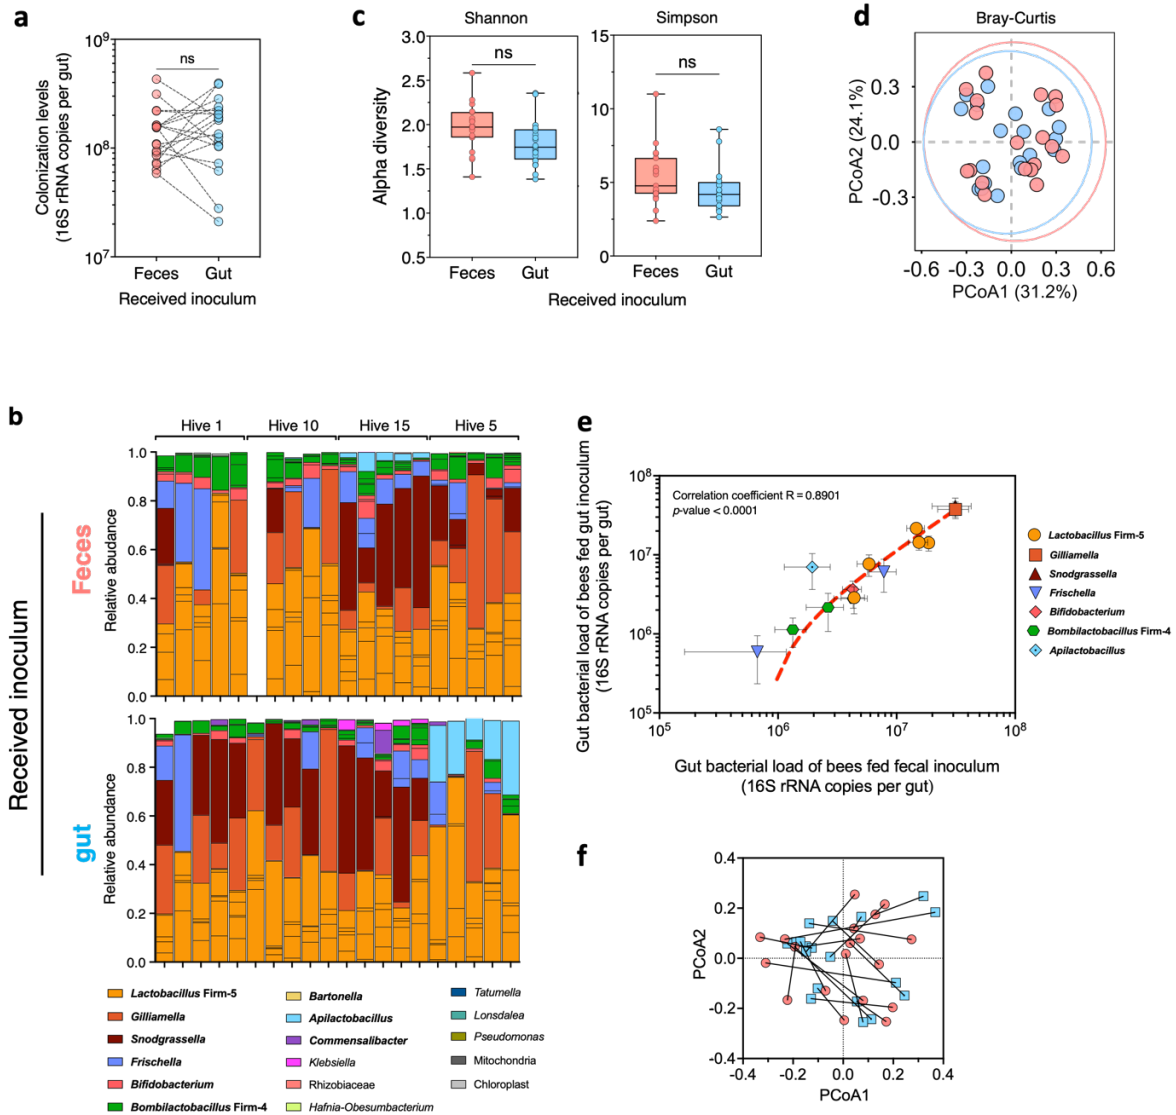

**Figure 3. Fecal transplant allows transmission of the honey bee gut microbiota. a**

Colonization levels of bacteria in the guts of bees inoculated with either a gut homogenate or an aliquot of feces (generation no. 2) did not differ significantly (Wilcoxon matched-pairs rank test, not significant (ns)). Matching samples (*i.e.*, inoculums sourced from the same individuals) are connected by dotted lines. **b** Stacked bar plots showing the relative abundance of amplicon-sequence variants (ASVs), colored by their genus level classification, identified in the gut of bees inoculated with either feces (top panel) or gut homogenates (bottom panel). Vertically aligned bars represent matching samples. Their hive of origin is indicated above. For ease of visualization, only ASVs with a relative abundance above 1% in at least 2 samples are displayed. Prevalent members of the honey bee gut microbiota are shown in bold. One sample from hive ten was lost during the DNA extraction process. **c** Bacterial  $\alpha$ -diversity in the gut did not differ significantly between gut-inoculated and feces-inoculated bees based on both the Shannon and Simpson indexes (Unpaired  $t$ -tests (two-tailed), not significant, ns). **d** Principal-coordinate analysis (PCoA) based on the Bray-Curtis dissimilarity index showed no significant difference in  $\beta$ -diversity

between the gut samples of feces-inoculated (red) and gut-inoculated (blue) bees (PERMANOVA test, not significant). **e** Scatter plot showing a significant correlation in absolute abundances of identified ASVs in the gut between feces-inoculated and gut-inoculated bees (Pearson's correlation coefficient and  $p$ -value are shown within the plot). Only ASVs with an absolute abundance above 1% in at least 5 samples are displayed for clarity. The red dotted line represents the linear regression curve. **f** Procrustes analysis of relative ASVs abundances in the gut of feces-inoculated bees (red) against gut-inoculated bees (blue) revealed no significant agreement between sample pairs obtained from bees of generation no. 2 inoculated with feces and guts collected from the same donor. Longer lines on Procrustes plots indicate more dissimilarity between matching samples.

179

## 180 **Discussion**

181 Here, we characterized the bacterial composition of honey bee feces and found that  
182 the fecal microbiota resembles the gut microbiota. Moreover, inoculation of a small volume  
183 of feces to MF bees allowed all core microbiota members to establish in the gut, in similar  
184 relative and absolute amounts as the ones found in bees inoculated with a gut homogenate.

185 The analysis of the fecal microbiota is commonly used in humans, laboratory rodents,  
186 and wild vertebrates to establish correlations between environmental factors, the gut  
187 microbiota, and host physiology<sup>19,20</sup>. However, the use of fecal matter as a proxy for gut  
188 microbiota composition in humans has been questioned, as the fecal microbiota was found  
189 to differ from the mucosa-associated microbiota<sup>21-23</sup>. By contrast, we found that honey bees  
190 collected from different hives at the nursing age harbored all core and most prevalent  
191 members of the gut microbiota in their feces, in proportions similar to those found in entire  
192 guts. Strikingly, bacteria known to colonize the fore part of the gut, namely the ileum, were  
193 also detected in the feces. This was unlikely due to the shedding and elimination of dead  
194 bacteria as these bacteria were viable and successfully established in the gut of feces-  
195 inoculated bees. As the honey bee gut microbiota composition changes with age, behavioral  
196 task, and nutrition in the field<sup>24,25</sup>, it would be interesting to validate that variation in the  
197 composition of the fecal microbiota mirrors that of the whole gut under such internal and  
198 external constraints. Repeated sampling of feces did not affect bees' survival in a previous  
199 study where feces were sampled once per week across three weeks<sup>5</sup>. The possibility of non-

200 invasively monitoring gut microbiota composition via fecal matter collection will help identify  
201 the sources of variation in individual gut microbial communities and link this variation to  
202 concomitant changes in host phenotypes<sup>20</sup>. This will facilitate longitudinal field studies on  
203 natural populations of honey bees and wild bee species to further characterize ecological  
204 and evolutionary processes shaping host-microbe interaction<sup>20,26</sup>. Feces sampling might also  
205 be used as a tool to assess pathogen loads in the gut. Copley and colleagues found that the  
206 gut parasites *Nosema apis* and *Nosema ceranae* could be detected in the feces of  
207 contaminated honey bees<sup>27</sup>. However, the correlation between pathogen abundance in the  
208 feces and the gut still needs to be uncovered.

209         The presence of all core bacterial phylotypes in the gut of bees transplanted with a  
210 fecal inoculum confirms that the core gut microbiota can be acquired via ingestion of fecal  
211 matter, as suggested by previous studies<sup>11,12</sup>. While newly emerged honey bees probably  
212 encounter feces on the contaminated hive material<sup>12</sup>, coprophagy, a behavior consisting of  
213 feces consumption, has not been described in this insect. It is, however, common in  
214 gregarious and social insects and allows transmission of the gut microbiota between  
215 overlapping generations<sup>28</sup>. Insects may also benefit from the anti-microbial properties of  
216 feces via this behaviour<sup>29</sup>. For instance, fecal transplantation in newly emerged bumblebees  
217 led to the development of a gut microbiota similar to that of bumblebees from the donor and  
218 protected them against the gut parasite *Crithidia bombi*<sup>29,30</sup>. Our results push for the use of  
219 fecal transplantation to study the effect of gut microbiota transmission on microbial  
220 communities and host phenotypes with a more ecological approach compared to the  
221 currently used inoculation of gut homogenate. Given the volume of feces that can be  
222 collected from a single bee without altering its physiology ( $4.8 \pm 2.0 \mu\text{l}$  on average<sup>5</sup>), one can  
223 reasonably expect to inoculate at least four MF bees with feces from a single donor in future  
224 experiments. Further dilution of fecal material would likely still allow successful seeding of  
225 the gut microbiota of MF bees and would enable inoculation of more individuals.

226           Finally, we also found that while the bacterial communities in the feces and gut were  
227 more similar when originating from the same donor bee, such pairing did not transfer to  
228 generation no. 2 when analyzing the gut microbiota of bees inoculated with paired samples.  
229 Furthermore, paired samples across generations (*i.e.* gut of a bee from generation no. 2 and  
230 its inoculum) did not show greater similarity in microbiota composition than unpaired  
231 samples. Such decoupling of community structure across generations, likely suggests that  
232 community assembly mechanisms and the rearing environment play a greater role than the  
233 inoculum source in determining the final composition of the gut communities. Rearing bees  
234 of generation no. 2 in cages where social interaction, in particular trophallaxis events, and  
235 coprophagy are possible might have influenced the establishment of the bacterial community  
236 in the gut of inoculated bees, additionally to other known mechanisms affecting community  
237 assembly (*e.g.* interactions between different bacterial community members and between  
238 bacteria and the host)<sup>31</sup>.

239           In conclusion, our study not only confirms the hypothesis that the honey bee gut  
240 microbiota can be transmitted through contact with fecal matter but also opens doors toward  
241 longitudinal analyses of individual variation in gut microbiota composition. Feces sampling is  
242 a non-invasive method that will reduce the number of animals killed for experimental  
243 purposes. This is particularly critical for the study of endangered bee species, or species that  
244 are rare or difficult to maintain in laboratory settings. Future studies should yet confirm that  
245 feces are a good proxy for gut microbiota composition in other bee species. Fecal  
246 transplantation will offer unprecedented opportunities for studying host-microbe interactions  
247 in a non-destructive and ecologically relevant manner, as already done in humans and  
248 laboratory rodents<sup>19,32</sup>.

249

250 **Methods**

251 **Honey bee rearing and gut colonization.** Microbiota-free (MF) honey bees *Apis mellifera*  
252 *carnica* were obtained from four hives located at the University of Lausanne (VD, Switzerland),  
253 as previously described<sup>33</sup>. Briefly, mature pupae were transferred from capped brood frames  
254 to a sterile plastic box for each visited hive and they were kept in a dark incubator for 3 days  
255 (35 °C with 75 % humidity). Adult bees emerging in such laboratory conditions are MF as their  
256 gut is free of any symbionts. Bees had unlimited access to a source of sterile 1:1 (w/v) sucrose  
257 solution for the duration of the experiment.

258 On the third day, five adult nurse honey bees were collected from each of the four  
259 original hives (**Figure 1**). They were stunned using CO<sub>2</sub> and immobilized on ice at 4 °C, and  
260 their feces and guts were sampled as described previously<sup>5,16</sup>. Two volumes of 2 µl were  
261 collected from each fecal sample and diluted 1:10 (v/v) in either sterile PBS or with 1:1 (v/v)  
262 PBS:sucrose solution. Gut samples were homogenized in 1 ml of sterile PBS in bead-beating  
263 tubes containing zirconia beads using a FastPrep-25 5G apparatus (MP Biomedicals) set at  
264 6 m s<sup>-1</sup> for 30 sec. Homogenized gut samples were then diluted 1:10 (v/v) to a final volume of  
265 100 µl with 1:1 (v/v) PBS:sucrose solution. The PBS-diluted gut and fecal samples were  
266 stored at -80 °C for further DNA extraction. They constitute the samples of generation no. 1  
267 (**Fig. 1**). Feces and gut samples resuspended in PBS-sucrose solution were immediately used  
268 for the colonization of MF honey bees.

269 Gut colonization was carried out by individually pipette-feeding MF bees 5 µl of either  
270 diluted feces or gut homogenate, which were sourced from bees originating from the same  
271 hive. Additionally, each pair of bees colonized with feces or gut sampled from the same nurse  
272 bee were marked by a unique color mark painted on their thorax. It enabled the matching of  
273 individuals between generations. Colonized bees were kept in groups of 5 individuals in  
274 separate sterile cup cages according to their inoculum and hive of origin at 32 °C with 75 %  
275 humidity. Bees had access to a sterile sucrose solution and pollen sterilized by gamma-  
276 irradiation *ad libitum*.

277 After 7 days, honey bees were immobilized on ice at 4 °C, sacrificed and their guts  
278 were dissected. Gut samples were homogenized as described above and stored at -80 °C for  
279 further DNA extraction. They were considered samples of generation no. 2 (**Fig. 1**).

280

281 **DNA extraction.** DNA was extracted from the feces of bees from generation no. 1 (**Fig. 1**)  
282 and from the gut of bees from generation no. 1 and 2 (**Fig. 1**). Homogenized gut tissues were  
283 thawed on ice, and 478 µl of those were used for the DNA extraction procedure. The fecal  
284 samples were thawed on ice and diluted by mixing 15 µl of feces with additional sterile PBS,  
285 to a final volume of 478 µl. For the following steps, both diluted feces and homogenized guts  
286 were treated in the same way.

287 Each sample received 20 µl of 20 mg ml<sup>-1</sup> proteinase K and 2 µl of s-mercaptoethanol,  
288 resulting in 500 µl of source material. Samples were then diluted 2:1 (v/v) with 2X  
289 hexadecyltrimethylammonium bromide (CTAB), mixed by bead-beating with glass and  
290 zirconia beads using the FastPrep-25 5G set at 6 m s<sup>-1</sup> for 30 sec and incubated at 56 °C for  
291 1 h. Samples were mixed with 750 µl of phenol-chloroform-isoamyl alcohol (PCI; ratio  
292 25:24:1; pH = 8), and centrifuged at room temperature for 10 min at 16,000 *g*. The upper  
293 aqueous layer was transferred to a new tube with 500 µl of chloroform and mixed by  
294 vortexing. Samples were centrifuged again at room temperature for 10 min at 16,000 *g*. The  
295 upper aqueous layer was mixed with 900 µl of cold 100% ethanol and incubated overnight  
296 at -20 °C to allow for DNA precipitation. Samples were centrifuged at 4 °C for 30 min at 16,000  
297 *g* and the supernatant was discarded. DNA pellets were gently washed with 70% ice-cold  
298 ethanol, before being centrifuged again at 4 °C for 15 min at 16,000 *g*. The supernatant was  
299 discarded, and the remaining ethanol was evaporated at room temperature for approximately  
300 10 min. Dried DNA pellets were dissolved in 50 µl of nuclease-free water by incubation at 64  
301 °C for 10 min. Purification of the extracted DNA using CleanNGS magnetic beads (CleanNA)  
302 was automated with an Opentrons OT-2 pipetting robot. Briefly, DNA extracts were incubated



303 with 25  $\mu$ L of NGS beads at room temperature for 10 min. A magnet was involved to attract  
304 the beads and attached DNA at the bottom and clear the supernatant. Beads were rinsed  
305 twice with 110  $\mu$ L of ethanol (80%) and left to dry at room temperature for 10min. The  
306 obtained purified DNA extracts were resuspended in 45  $\mu$ L of Tris-HCl buffer (5  $\mu$ M; pH 8)  
307 and stored at -20 °C. One sample from hive ten was lost during the DNA extraction process.  
308

309 **16S rRNA amplicon-sequencing.** The extracted DNA was used as a template for 16S rRNA  
310 amplicon sequencing following the Illumina metagenomic sequencing official guidelines.  
311 Briefly, the 16S rRNA gene V4 region was amplified with the primers 515F (5'-  
312 TCGTCGGCAGCGTCAGATGTGTATAAGAGACAGGTGCCAGCMGCCGCGGTAA-3') and  
313 806R (5'-  
314 GTCTCGTGGGCTCGGAGATGTGTATAAGAGACAGGGACTACHVGGGTWTCTAAT-3'),  
315 using a high-fidelity polymerase (Phanta Max, Vazyme). PCR products were purified using  
316 CleanNGS magnetic beads (CleanNA) in a ratio of 0.8:1 beads to PCR product. Index PCR  
317 was performed using Illumina Nextera Index Kit v2 adapters and resulting amplicons were  
318 purified again using CleanNGS magnetic beads. PCR products were purified once more  
319 using CleanNGS beads in a ratio of 1.12:1 beads to PCR product. Sample concentrations  
320 were normalized based on PicoGreen (Invitrogen) quantification and pooled together. Short-  
321 read amplicon sequencing was carried out with an Illumina MiSeq sequencer at the Genomic  
322 Technology Facility of the University of Lausanne (Switzerland), producing 2 x 250-bp paired-  
323 end reads *via* 150 cycles. Negative controls of DNA extraction and PCR amplification were  
324 also sequenced for reference.

325

326 **Microbial community structure analyses.** The bacterial communities present in fecal and  
327 gut samples were determined based on analysis of Illumina sequencing, as previously  
328 described<sup>8</sup>. Briefly, raw sequencing data were pre-processed by clipping the primer  
329 sequences from all reads using Cutadapt<sup>34</sup> (version 4.2 with Python version 3.11.2).

330 Sequencing data were then processed following the Divisive Amplicon Denoising Algorithm  
331 2 pipeline<sup>35</sup> (DADA2; version 3.16) run with R (version 4.2.2). The end of sequences with low  
332 quality were further trimmed after 232 and 231 bp, for forward and reverse reads,  
333 respectively.

334 The resulting reads were denoised using the core sample inference algorithm of  
335 DADA2, based on error rate learning determined by analyzing 3<sup>8</sup> minimum numbers of total  
336 bases from samples picked at random ('nbases' and 'randomize' arguments), and paired-  
337 end sequences were merged. Unique sequences outside the 250:255-bp range were  
338 removed alongside chimeras. The obtained amplicon-sequence variants (ASVs) were  
339 classified using the SILVA reference database (version 138.1)<sup>36</sup>. The taxonomic classification  
340 was complemented *via* Blast searches to further discriminate ASVs identified as the genus  
341 *Lactobacillus* as either the core phylotypes Firm-5 and Firm-4 of the bee gut microbiota or  
342 other non-core *Lactobacillus* species. The dataset was cleaned using Phyloseq<sup>37</sup> (version  
343 1.42.0) by removing any unclassified and eukaryotes ASVs. Lastly, the R package  
344 Decontam<sup>38</sup> (version 1.18.0) was used to remove contaminants based on prevalence and  
345 frequency methods.

346

347 **Bacterial load quantification by qPCR.** Bacterial loads in the gut and feces samples were  
348 determined from quantitative PCRs (qPCRs), as previously described<sup>33</sup>. Briefly, universal  
349 primers of the 16S rRNA gene were used to determine bacterial load (forward: 5'-  
350 AGGATTAGATACCCTGGTAGTCC-3'; reverse: 5'-YCGTACTCCCCAGGCGG-3') and  
351 primers specific to the *Actin* gene of *A. mellifera* were employed as control of sample quality  
352 (forward: 5'-TGCCAACACTGTCCTTTCTG-3'; reverse: 5'-AGAATTGACCCACCAATCCA-3').  
353 Corresponding standard curves were generated using serial dilutions of plasmids bearing the  
354 target sequences for the 16S rRNA and *Actin* genes.

355 Purified DNA was used as a template for qPCR reactions by mixing 1 µl of DNA to 5  
356 µl of 2X SYBR Select Master Mix (ThermoFisher), 3.6 µl of nuclease-free water, and 0.2 µl of

357 each appropriate 5  $\mu$ M primers. Amplification reactions were performed with a QuantStudio  
358 5 real-time PCR machine (ThermoFisher), with the following thermal cycling conditions: 50  $^{\circ}$ C  
359 for 2 min and 95 $^{\circ}$ C for 2 min for denaturation of DNA, followed by 40 amplification cycles  
360 consisting of 95  $^{\circ}$ C for 15 sec and 60  $^{\circ}$ C for 1 min. Each reaction was performed in triplicate.

361 The quantification of gene copy numbers was performed following a published  
362 detailed protocol<sup>33</sup>. The slope of the standard curves for each target (*i.e.* universal 16S rRNA  
363 gene and *actin*) was used to calculate the primer efficiencies ( $E$ ) according to the equation:  $E$   
364 =  $10^{(-1/\text{slope})}$ . The copy number  $n$  in 1  $\mu$ L of DNA was obtained using the formula  $n = E^{(\text{intercept}-$   
365  $C_q)}$ . This number was multiplied by the elution volume of the DNA extract to obtain the copy  
366 number per gut. Finally, the bacterial 16S rRNA gene copy number was normalized for each  
367 sample by dividing it by the corresponding *actin* copy number and multiplying by the median  
368 of *actin* copy numbers across all samples.

369

370 **Statistical analyses.** All statistical analyses were performed in R (version 4.2.2). Absolute  
371 abundances of each ASV in each sample were calculated by multiplying their proportion by  
372 the normalized 16S rRNA gene copy number measured by qPCR. Measures of  $\alpha$  diversity  
373 (Shannon and Simpson metrics) were obtained with the Phyloseq package<sup>37</sup> (version 1.42.0).  
374 Their normal distribution and homoscedasticity were assessed using a Shapiro-Wilk test and  
375 a Bartlett test respectively. For normally distributed and homoscedastic data, differences in  
376  $\alpha$  diversity metrics between sample types were tested using paired t-tests, otherwise they  
377 were analyzed with two-sided Wilcoxon matched-pairs tests. Difference in community  
378 structure was assessed based on Bray-Curtis dissimilarities (Phyloseq) using a Adonis and  
379 Permutation test (vegan<sup>39</sup>; version 2.6-4). Estimation of correlation between sample pairs was  
380 done using Procrustes and Mantel tests based on the Pearson correlation method (ade4<sup>40</sup>;  
381 version 1.7.22 and vegan). ASVs with significant differences in their relative abundances

382 between sample types in generation no. 1 were determined using the DESeq2 package<sup>41</sup>  
383 (version 1.38.3).

384

## 385 **References**

- 386 1. Kwong, W. K. *et al.* Dynamic microbiome evolution in social bees. *Sci. Adv.* **3**,  
387 e1600513 (2017).
- 388 2. Engel, P., Martinson, V. G. & Moran, N. A. Functional diversity within the simple gut  
389 microbiota of the honey bee. *Proc. Natl. Acad. Sci.* **109**, 11002–11007 (2012).
- 390 3. Engel, P. *et al.* The bee microbiome: impact on bee health and model for evolution  
391 and ecology of host-microbe interactions. *MBio* **7**, e02164-15 (2016).
- 392 4. Kwong, W. K. & Moran, N. A. Gut microbial communities of social bees. *Nat. Rev.*  
393 *Microbiol.* **14**, 374–384 (2016).
- 394 5. Chhun, A. *et al.* Engineering a symbiont as a biosensor for the honey bee gut  
395 environment. *bioRxiv* 2023.02.02.526826 (2023).
- 396 6. Leonard, S. P. *et al.* Genetic Engineering of Bee Gut Microbiome Bacteria with a Toolkit  
397 for Modular Assembly of Broad-Host-Range Plasmids. *ACS Synth. Biol.* **7**, 1279–1290  
398 (2018).
- 399 7. Raymann, K. & Moran, N. A. The role of the gut microbiome in health and disease of  
400 adult honey bee workers. *Curr. Opin. Insect Sci.* **26**, 97–104 (2018).
- 401 8. Liberti, J. *et al.* The gut microbiota affects the social network of honeybees. *Nat. Ecol.*  
402 *Evol.* **6**, 1471–1479 (2022).
- 403 9. Zhang, Z. *et al.* Honeybee gut *Lactobacillus* modulates host learning and memory  
404 behaviors via regulating tryptophan metabolism. *Nat. Commun.* **13**, 2037 (2022).
- 405 10. Cabirol, A., Schafer, J., Neuschwander, N., Kesner, L. & Liberti, J. A defined  
406 community of core gut microbiota members promotes cognitive performance in honey  
407 bees. *BioRxiv* <https://doi.org/10.1101/2023.01.03.522593> (2023).

- 408 11. Martinson, V. G., Moy, J. & Moran, N. A. Establishment of characteristic gut bacteria  
409 during development of the Honeybee worker. *Appl. Environ. Microbiol.* **78**, 2830–2840  
410 (2012).
- 411 12. Powell, J. E., Martinson, V. G., Urban-mead, K. & Moran, A. Routes of acquisition of  
412 the gut microbiota of the Honey Bee *Apis mellifera*. *Appl. Environ. Microbiol.* **80**, 7378–  
413 7387 (2014).
- 414 13. Maes, P. W., Floyd, A. S., Mott, B. M. & Anderson, K. E. Overwintering honey bee  
415 colonies: Effect of worker age and climate on the hindgut microbiota. *Insects* **12**, 1–16  
416 (2021).
- 417 14. Anderson, K. E., Ricigliano, V. A., Mott, B. M. & Maes, P. Social Interaction is  
418 Unnecessary for Hindgut Microbiome Transmission in Honey Bees : the Effect of Diet  
419 and Social Exposure on Tissue-Specific Microbiome Assembly. *Microb. Ecol.* 0–29  
420 (2021). doi:10.1007/s00248-022-02025-5
- 421 15. Sampson, H. R., Allcock, N., Mallon, E. B., Ketley, J. M. & Morrissey, J. A. Air pollution  
422 modifies key colonization factors of the beneficial bee gut symbiont *Snodgrassella alvi*  
423 and disrupts the bumblebee (*Bombus terrestris*) gut microbiome. *bioRxiv* (2023).
- 424 16. Bailey, L., Ball, B. V. & Perry, J. N. Association of viruses with two protozoal pathogens  
425 of the honey bee. *Ann. Appl. Biol.* **103**, 13–20 (1983).
- 426 17. Ellegaard, K. M., Suenami, S., Miyazaki, R. & Engel, P. Vast Differences in Strain-Level  
427 Diversity in the Gut Microbiota of Two Closely Related Honey Bee Species. *Curr. Biol.*  
428 **30**, 2520-2531.e7 (2020).
- 429 18. Zheng, J. *et al.* A taxonomic note on the genus *Lactobacillus*: Description of 23 novel  
430 genera, emended description of the genus *Lactobacillus* beijerinck 1901, and union of  
431 *Lactobacillaceae* and *Leuconostocaceae*. *Int. J. Syst. Evol. Microbiol.* **70**, 2782–2858  
432 (2020).
- 433 19. Cryan, J. F. & Mazmanian, S. K. Microbiota–brain axis: Context and causality. *Science*

- 434 (80- ). **376**, 938–939 (2022).
- 435 20. Davidson, G. L., Raulo, A. & Knowles, S. C. L. Identifying microbiome-mediated  
436 behaviour in wild vertebrates. *Trends Ecol. Evol.* **35**, 972–980 (2020).
- 437 21. Ringel, Y. *et al.* High throughput sequencing reveals distinct microbial populations  
438 within the mucosal and luminal niches in healthy individuals. *Gut Microbes* **6**, 173–181  
439 (2015).
- 440 22. Tang, Q. *et al.* Current Sampling Methods for Gut Microbiota: A Call for More Precise  
441 Devices. *Front. Cell. Infect. Microbiol.* **10**, (2020).
- 442 23. Zoetendal, E. G. *et al.* Mucosa-associated bacteria in the human gastrointestinal tract  
443 are uniformly distributed along the colon and differ from the community recovered from  
444 feces. *Appl. Environ. Microbiol.* **68**, 3401–3407 (2002).
- 445 24. Jones, J. C. *et al.* Gut microbiota composition is associated with environmental  
446 landscape in honey bees. *Ecol. Evol.* **8**, 441–451 (2018).
- 447 25. Jones, J. *et al.* The gut microbiome is associated with behavioural task in honey bees.  
448 *Insectes Soc.* **65**, 419–429 (2018).
- 449 26. Sheldon, B. C., Kruuk, L. E. B. & Alberts, S. C. The expanding value of long-term  
450 studies of individuals in the wild. *Nat. Ecol. Evol.* **6**, 1799–1801 (2022).
- 451 27. Copley, T. R., Giovenazzo, P. & Jabaji, S. H. Detection of *Nosema apis* and *N. ceranae*  
452 in honeybee bottom scraps and frass in naturally infected hives. *Apidologie* **43**, 753–  
453 760 (2012).
- 454 28. Onchuru, T. O., Javier Martinez, A., Ingham, C. S. & Kaltenpoth, M. Transmission of  
455 mutualistic bacteria in social and gregarious insects. *Curr. Opin. Insect Sci.* **28**, 50–58  
456 (2018).
- 457 29. Cole, M. E., Ceja-Navarro, J. A. & Mikaelyan, A. The power of poop: Defecation  
458 behaviors and social hygiene in insects. *PLoS Pathog.* **17**, 1–6 (2021).
- 459 30. Koch, H. & Schmid-Hempel, P. Socially transmitted gut microbiota protect bumble

- 460 bees against an intestinal parasite. *Proc. Natl. Acad. Sci. U. S. A.* **108**, 19288–19292  
461 (2011).
- 462 31. Ellegaard, K. M. & Engel, P. Genomic diversity landscape of the honey bee gut  
463 microbiota. *Nat. Commun.* **10**, 446 (2019).
- 464 32. Cryan, J. F. & Dinan, T. G. Mind-altering microorganisms: The impact of the gut  
465 microbiota on brain and behaviour. *Nat. Rev. Neurosci.* **13**, 701–712 (2012).
- 466 33. Kešnerová, L. *et al.* Disentangling metabolic functions of bacteria in the honey bee gut.  
467 *PLoS Biol.* **15**, e2003467 (2017).
- 468 34. Martin, M. Cutadapt removes adapter sequences from high-throughput sequencing  
469 reads. *EMBnet.journal* **17**, 10–12 (2011).
- 470 35. Callahan, B. J. *et al.* DADA2: High-resolution sample inference from Illumina amplicon  
471 data. *Nat. Methods* **13**, 581–583 (2016).
- 472 36. Quast, C. *et al.* The SILVA ribosomal RNA gene database project: Improved data  
473 processing and web-based tools. *Nucleic Acids Res.* **41**, 590–596 (2013).
- 474 37. McMurdie, P. J. & Holmes, S. Phyloseq: An R Package for Reproducible Interactive  
475 Analysis and Graphics of Microbiome Census Data. *PLoS One* **8**, (2013).
- 476 38. Davis, N. M., Proctor, Di. M., Holmes, S. P., Relman, D. A. & Callahan, B. J. Simple  
477 statistical identification and removal of contaminant sequences in marker-gene and  
478 metagenomics data. *Microbiome* **6**, 1–14 (2018).
- 479 39. Dixon, P. VEGAN, a package of R functions for community ecology. *J. Veg. Sci.* **14**,  
480 927–930 (2003).
- 481 40. Bougeard, S. & Dray, S. Supervised multiblock analysis in R with the ade4 package. *J.*  
482 *Stat. Softw.* **86**, 1–17 (2018).
- 483 41. Love, M. I., Huber, W. & Anders, S. Moderated estimation of fold change and  
484 dispersion for RNA-seq data with DESeq2. *Genome Biol.* **15**, 1–21 (2014).

485

## 486 **Acknowledgements**

487 We thank Florian Zoppi for his continuous support in the laboratory. We also thank the  
488 Genomic Technologies Facility of the University of Lausanne, Switzerland, for performing  
489 Illumina sequencing. This work was supported by the Marie Skłodowska-Curie fellowships  
490 HarmHoney (grant no. 892574, awarded to A.Ca.) and BRAIN (grant no. 797113, awarded to  
491 J.L.), the NCCR Microbiomes (National Centre of Competence in Research), funded by the  
492 Swiss National Science Foundation (SNSF, grant no. 180575), and an ERC Starting Grant  
493 (MicroBeeOme, grant no. 714804) and SNSF Consolidator grant (grant no. TMC3-3\_213860)  
494 both awarded to P.E..

495

## 496 **Author contributions**

497 The original idea for this manuscript emerged from discussions between A.Ca., A.Ch. and  
498 J.L.. A.Ca. and A.Ch. conceived the study, designed experiments, carried out bee  
499 experiments, and DNA extractions. N.N. performed the purification of DNA samples. L.K.  
500 performed qPCR experiments. A.Ch. and J.L. performed AmpliSeq libraries preparations.  
501 J.L. and A.Ch. analyzed the amplicon sequencing data and quantitative PCR data with  
502 assistance from A.Ca.. A.Ch. plotted the graphs. Y.S. and P.E. supervised the project. A.Ca.  
503 and A.Ch. drafted the manuscript. All authors edited subsequent drafts.

504

## 505 **Competing interests**

506 The authors declare no competing interests.

507

508

509

510

511



512 **Supplementary material**

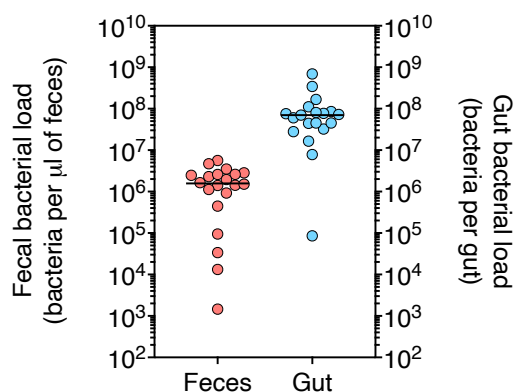

**Supplementary Figure 1.** Bacterial loads measured as copies of the 16S rRNA gene in the fecal and gut samples of bees from generation no. 1.

513

514

515

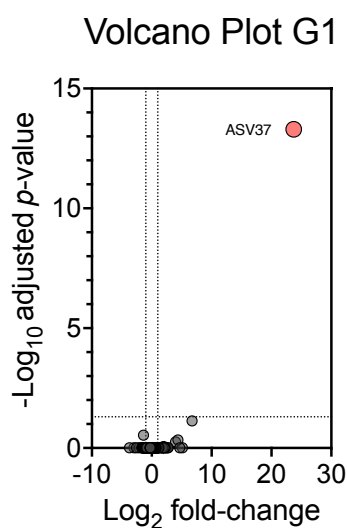

**Supplementary Figure 2.** Volcano plot presenting significance vs. fold-change based on relative abundances of all amplicon sequence variants (ASVs) in the gut compared to the fecal samples of nurse bees from generation no. 1. The colored ASV was significantly different in DESeq2 analyses (FDR-corrected  $P < 0.05$ ).

516

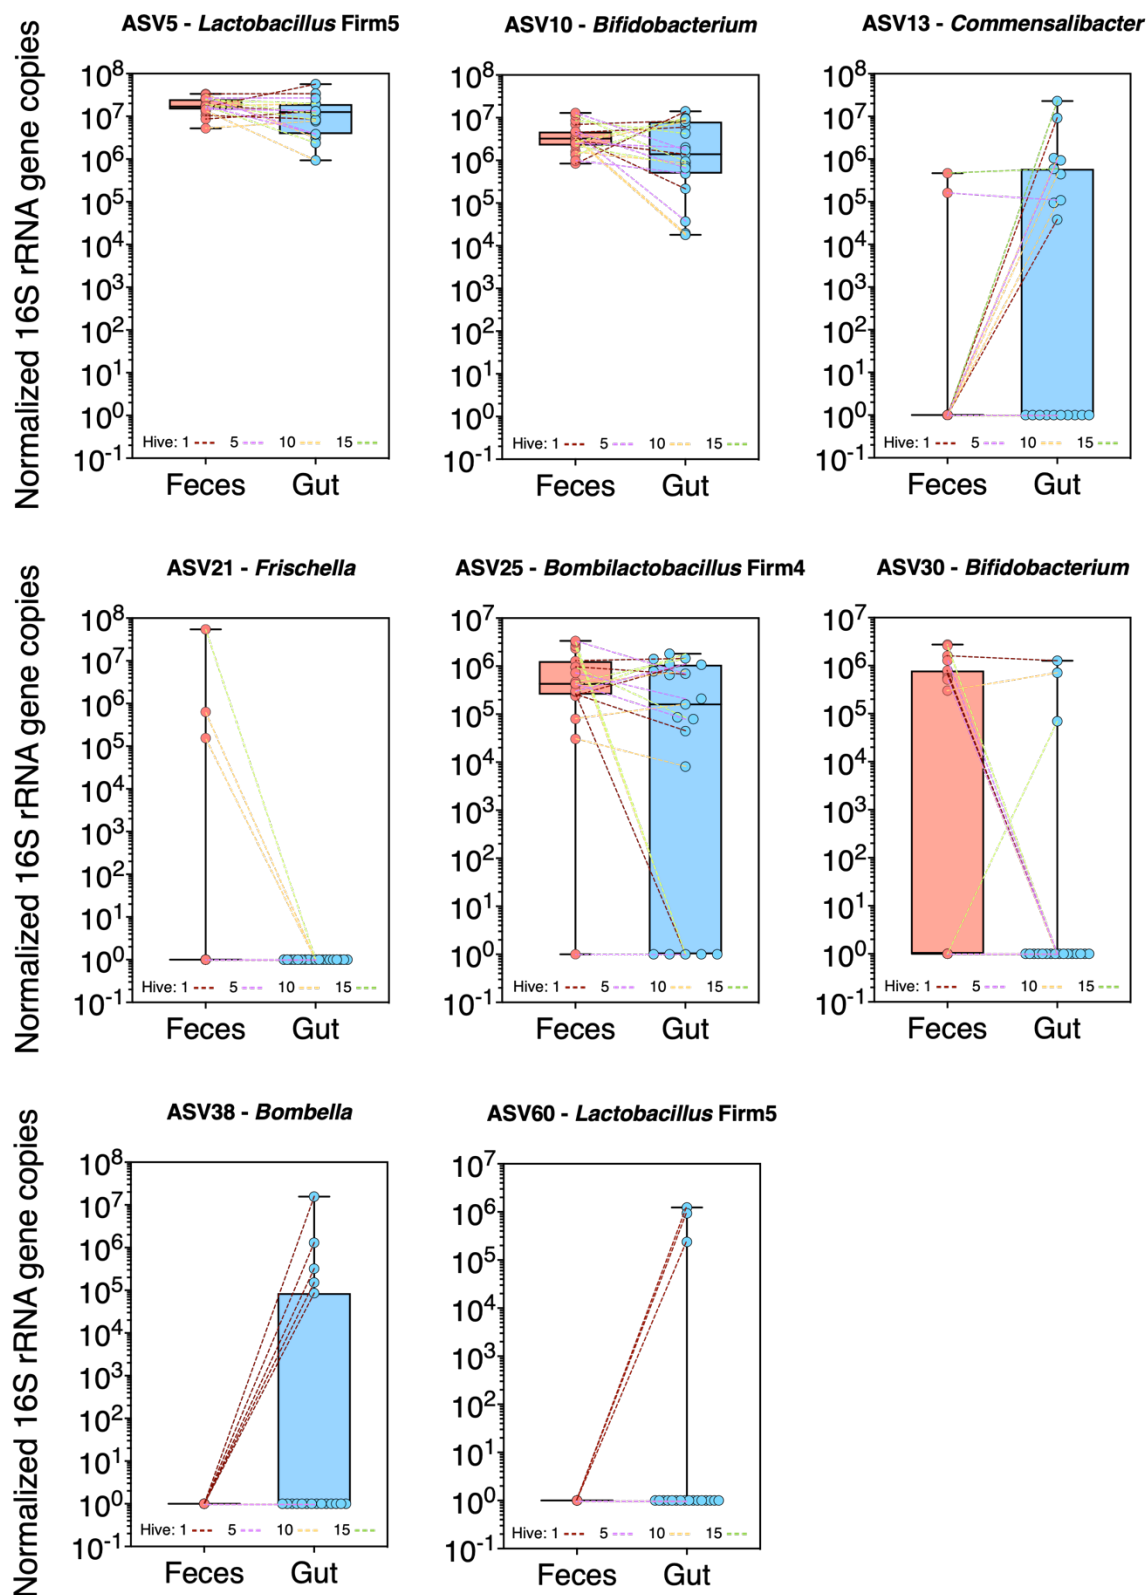

**Supplementary Figure 3.** Significantly different 16S rRNA gene copies of various ASVs in the gut of bees inoculated with either feces or gut homogenate.

518

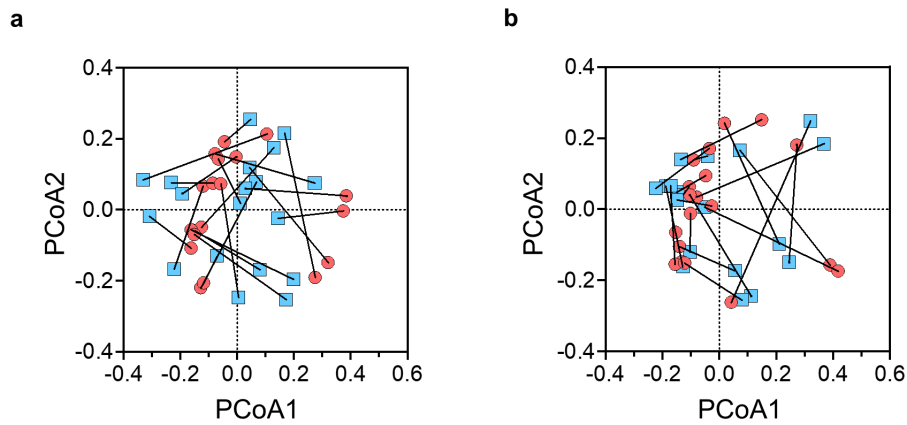

519

520 **Supplementary Figure 4.** Procrustes analysis of relative ASVs abundances in the fecal **(a)**

521 or gut **(b)** samples of bees from generation no. 1 (red) against the gut of bees from generation

522 no. 2 (blue) was obtained from PCoA and revealed no significant agreement of comparison.
